# Supplementary material for: Insights on the Structural and Metabolic Resistance of Potato (Solanum tuberosum) Cultivars to Tuber Black Dot (Colletotrichum coccodes)
Source: PubMed Central journal article supplement (PMC7468465; doi:10.3389/fpls.2020.01287), 2020-08-20
Supplement: Image_1.pdf [file Image_1.pdf]

A

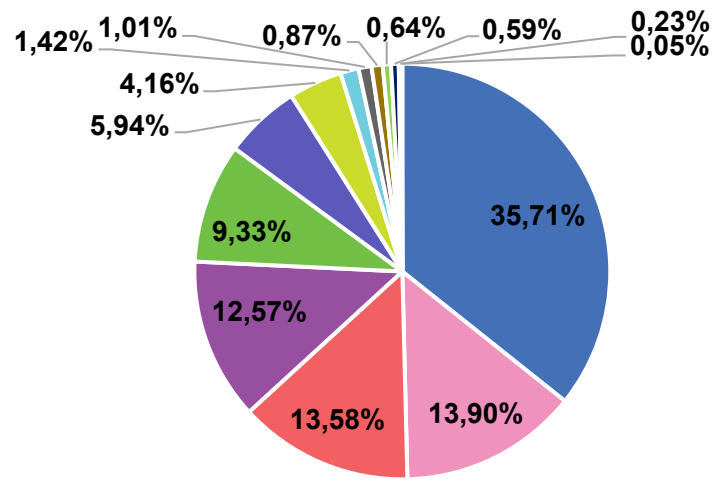

- Lipid and lipid-like
- Organoheterocyclic compounds
- Phenylpropanoids and polyketides
- Organic oxygen compounds
- Benzenoids
- Organic acids
- Alkaloids and derivatives
- Lignans
- Organic nitrogen compounds
- Nucleosides
- Organosulfur compounds
- Hydrocarbons
- Organohalogen compounds

B

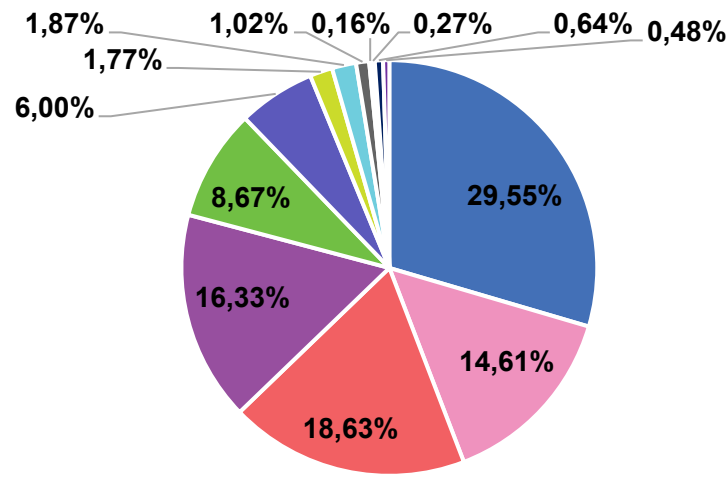

**Supplementary Figure 1:** Pie-chart of the chemical classes of compounds detected in potato periderms in positive (A) and negative (B) ionization modes as annotated by the ISDB-DNP and classified using ClassyFire.
