# Supplementary material for: Insights on the Structural and Metabolic Resistance of Potato (Solanum tuberosum) Cultivars to Tuber Black Dot (Colletotrichum coccodes)
Source: PubMed Central journal article supplement (PMC7468465; doi:10.3389/fpls.2020.01287), 2020-08-20
Supplement: Image_5.pdf [file Image_5.pdf]

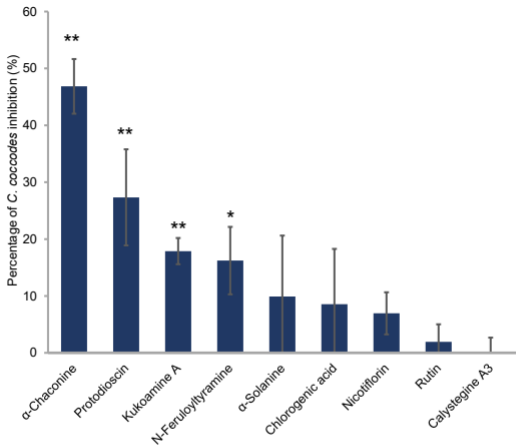

**Supplementary Figure 5:** Inhibition of *C. coccodes* growth (%) *in vitro* at the highest estimated concentration in potato tubers (n=3, Mean  $\pm$  Standard deviation). Chlorogenic acid 7,5 mM, alpha-chaconine and calystegine A3 500  $\mu$ M, alpha-solanine 250  $\mu$ M, rutin and protodioscin 100  $\mu$ M, N-feruloyltyramine, N1,N12-bis(dihydrocaffeoyl) spermine and nicotiflorin at 50  $\mu$ M.
